# Supplementary material for: Three-dimensional PtNi hollow nanochains as an enhanced electrocatalyst for the oxygen reduction reaction
Source: Royal Society of Chemistry journal article supplement (doi:10.1039/c6ta01801g), 2016-01-01
Supplement: c6ta01801g1.pdf [file c6ta01801g1.pdf]

# Three-dimensional PtNi Hollow Nanochains with Porous Structures as Enhanced Electrocatalyst for Oxygen Reduction Reaction

Shaofang Fu,<sup>a</sup> Chengzhou Zhu,<sup>a\*</sup> Junhua Song,<sup>a</sup> Mark Engelhard,<sup>b</sup> Yang He,<sup>c</sup> Dan

Du,<sup>a</sup> Chongmin Wang,<sup>b</sup> Yuehe Lin<sup>a\*</sup>

<sup>a</sup> The School of Mechanical and Materials Engineering, Washington State University, Pullman, WA 99164, USA.

<sup>b</sup> Environmental Molecular Sciences Laboratory, Pacific Northwest National Laboratory, Richland, WA 99352, USA.

<sup>c</sup> Department of Mechanical Engineering and Materials Science, University of Pittsburgh, PA 15261, USA.

Email: [chengzhou.zhu@wsu.edu](mailto:chengzhou.zhu@wsu.edu); [yuehe.lin@wsu.edu](mailto:yuehe.lin@wsu.edu)

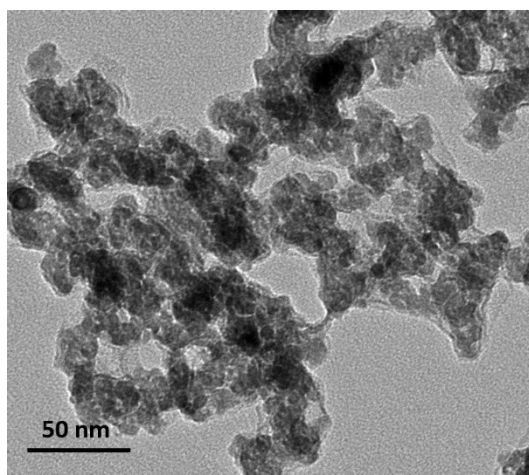

Figure S1. TEM image of Ni nanosponges.

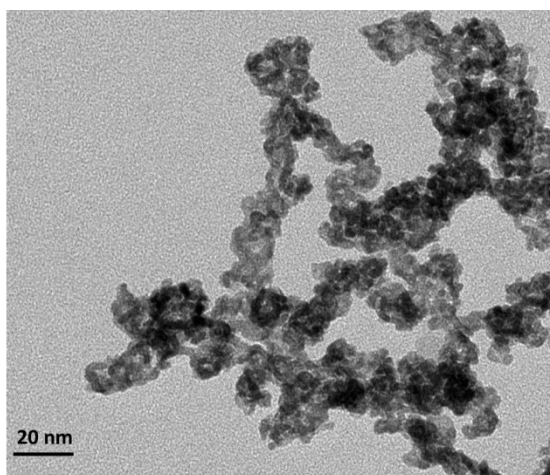

Figure S2. TEM image of PtNi without addition of F-127.

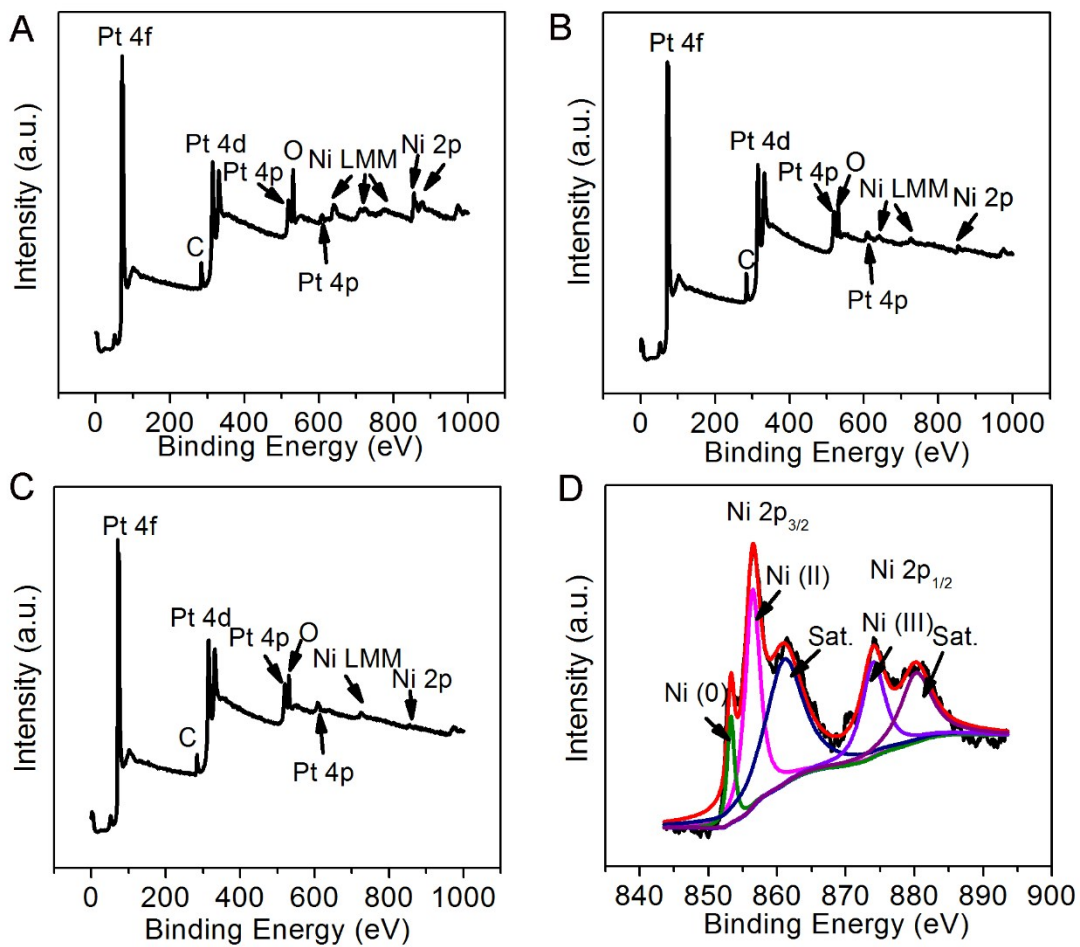

Figure S3. XPS spectra of 3D Pt<sub>77</sub>Ni<sub>23</sub> (A), Pt<sub>85</sub>Ni<sub>15</sub> (B), and Pt<sub>91</sub>Ni<sub>9</sub> (C) HNCs. (D)

High resolution XPS spectrum of Ni for 3D Pt<sub>77</sub>Ni<sub>23</sub> HNCs.

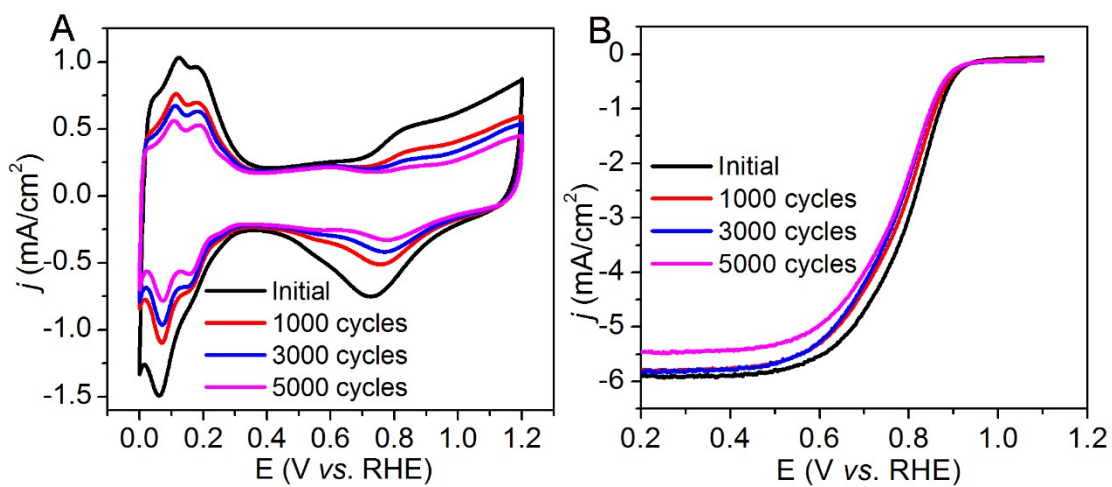

Figure S4. (A) CV curves of Pt/C after prolonged cycles of CV with a scan rate of 100

mV/s. (B) LSV curves of Pt/C after potential sweep cycles.
